# Supplementary material for: Adapting Safety Planning for Autistic Adults with Trauma Histories: A Thematic Analysis from a UK Community Service
Source: Research Square preprint supplement (doi:10.21203/rs.3.rs-6602818/v1), 2025-06-18
Supplement: Supplementary file 1 [file 6efef379e4b393ea1bf97263.docx]

**Appendices**

**Appendix A**

This appendix includes a copy of the data extraction tool used to gather data on autistic participants. The summary of findings provides overall statistics and some summarised quote examples. This data allowed for the preliminary theming to take place (see Appendix B).

Table A1. Data extraction tool and summary of findings

| Measure | Summary of findings (statistics and summarised quote examples) |
| --- | --- |
| Autism ‘Diagnosed’ / ’suspected’, n | Suspected, 21  Diagnosed, 17 |
| Sex, n | Female, 29  Male, 9 |
| Age, M | 31.8 |
| Safety plan type ‘full’ / ’flashcard’, n | Full, 32  Flashcard, 6 |
| Number of sessions, M | 2.95 |
| ‘Did not attend’ sessions, M | .57 |
| Safety plan completed / incomplete, n | Completed, 33 (87%)  Incomplete, 5 |
| Communication mode used, n | Telephone, 22  Videocall, 12  In-person, 3  In-person and telephone, 1 |
| Communication mode preferred or requested, n | In-person, 13  Telephone, 3  Telephone or videocall, 2 |
| Clinician preferred or requested | “Female, similar background”  “Female, understands neurodivergence and trauma” |
| Support or awareness requested | “Patient, doesn't speak loudly”  “May ask to repeat questions”  “Emailed to request support letter for uni extensions”  “Clinician aware of past trauma”  “Contact mum for future appointments”  “Aware of menstrual cycle impact”  “Bring reborn doll to session”  “Support with autism form”  “Letter for work support”  “Name preference” |
| Session adjustments | “Additional session to complete autism form”  “Rescheduled, didn’t think she’d be engaged”  “Camera off, uncomfortable” |
| Clinician-offered autism support | “Compassionate approach to reduce self-blame and criticism, suggested thought diary for catastrophising”  “Offered additional sessions to support ASC difficulties like masking following distressing social incident”  “Agreed that clinicians would not make unexpected calls”  “Offered 30 min call due to anxiety of long phone call”  “Explored ASC referral, discussed managing sensory overload”  “Informed that friend can join”  “Discussed diagnosis, which might explain this feeling”  “Direct questions (no abstract/complex examples)” |
| Patient-expressed and/or observed autism-related difficulties | “Discussed social difficulties and feeling different”  “May have difficulties expressing self”  “Camera off, uncomfortable”  “Find telephone and videocall triggering”  “Spoke about diagnosis and masking. Planned to explain to partners about different perception due to ASC”  “Struggles with eye contact in person and can stutter, increases anxiety”  “Not had ASC assessment as went through Right to Choose pathway since NHS referral would have taken years. Expressed may be helpful in understanding self”  “Chose to end session early as nothing else wanted to speak about. Stated felt drained and initially planned to reschedule session”  “Stated uncertain about group ECS due to anxiety. Difficulty with recognising changing moods/'what do I know about me”  “When asked to plan next steps for the day to ensure safety, became overwhelmed and difficult to think” |

**Appendix B**

This appendix provides an overview of the initial needs or adaptions identified during safety planning sessions with autistic patients. These initial themes were identified through a preliminary frequency-based coding process and guided the subsequent thematic analysis. Sub-themes reflect more specific preferences or circumstances. Frequencies represent the number of patients (*N* = 38) who indicated each support need or adaptation.

Table B1. Preliminary coding: Support measures provided for autistic patients

| Themes, (n) | Sub-themes, (n) |
| --- | --- |
| Preference for communication mode (18) | Face-to-face (13)  Telephone (6)  Video consultation (2) |
| Additional session (12) |  |
| ASC referral discussed (10) | Supported with ASC form and referral (5) |
| Discussed ASC-related difficulties (8) |  |
| Preference for female clinician (8) | More comfort discussing trauma/sensitive topics (3)  With pre-awareness of trauma (1)  With similar background (1)  Understands neurodivergence/trauma (1) |
| Overwhelmed during session (7) |  |
| Engagement difficulties (7) | Anxiety/difficulty with telephone call (4)  Length of telephone session (2)  Unexpected calls (2) |
| Turned camera off on video session (5) |  |
| Expressed desire for ASC diagnosis (5) | To better understand self/difficulties (2) |
| Ended session early (4) |  |
| Rescheduled session (4) |  |
| Requested mum involved in contact (4) |  |
| Expressed aversion to Group coping skills (4) |  |
| Requested support letter (5) | For university (4)  For work (1) |
| Preference for clinician with understanding of neurodivergence (2) | In the context of trauma (1) |
| Preference for slow pace (2) | Quieter voice (1)  To repeat questions (1) |

**Appendix C**

Practical thematic analysis: Codebooks

This appendix provides the final codebooks agreed upon between authors as derived from the further explorative thematic analysis. Table C1 shows the themes and codes relating to the needs identified in autistic patients, while Table C2 provides the themes and codes relating to the adaptations or support measures offered to autistic patients. Theme names were later transformed into two major themes and five sub-theme names as deeper patterns emerged.

Table C1. Themes and codes of the needs of autistic patients

| Themes and Codes | Salience |
| --- | --- |
| **Theme 1: Communication and processing differences** | **58** |
| Social difficulties | 25 |
| Information or sensory processing | 17 |
| Communication challenges | 8 |
| Difficulty identifying/understanding emotion | 8 |
| Difficulty engaging in session | 7 |
| Turned camera off on videocall session | 7 |
| Overstimulation | 5 |
| Forgot or late to session | 5 |
| Difficulty expressing self | 3 |
| **Theme 2: Setting and trust in clinician** | **48** |
| Face-to-face session | 13 |
| Female clinician | 8 |
| Third party support | 7 |
| Telephone session | 6 |
| Contact/Info share with mother | 5 |
| Slow pace | 3 |
| Direct language | 3 |
| Clinician experienced in neurodivergence and/or with trauma | 3 |
| Clinician from similar background | 1 |
| **Theme 3: Anxiety and discomfort** | **41** |
| Overwhelm | 19 |
| Anxiety with telephone calls | 9 |
| Anxiety | 7 |
| Triggered following session | 6 |
| Cyclical mood/menstrual cycle impact | 6 |
| Emotional during session | 4 |
| Anxious during session | 3 |
| **Theme 4: Repetitive thinking** | **25** |
| Rumination | 15 |
| Hearing voice | 10 |
| **Theme 5: Integration and relational difficulties** | **22** |
| Isolation | 6 |
| Masking | 6 |
| Feels don't belong | 5 |
| Struggle with relationships | 5 |
| **Theme 6: Need for flexibility** | **16** |
| Request appointment time preference | 7 |
| Request flexibility with platform | 7 |
| Request flexibility with appointments | 2 |
| **Theme 7: Identity-related goals** | **7** |
| Desire to understand self | 4 |
| Desire to be 'normal' | 3 |

Table C2. Themes and codes of adaptations provided to autistic patients

| Themes and Codes | Salience |
| --- | --- |
| **Theme 1: ASC-related support** | **38** |
| Support with ASC referral | 18 |
| ASC explored | 11 |
| Linked observations to ASC | 9 |
| **Theme 2: Flexibility and session adjustments** | **26** |
| Additional session | 12 |
| Rescheduled session | 8 |
| Shortened session | 6 |
| **Theme 3: Service referral and wider support** | **18** |
| Support with contacting or referring to other services | 7 |
| Support with university | 4 |
| Support with contacting GP | 4 |
| Support with employment | 3 |
| **Theme 4: Communication-related support** | **17** |
| Third party support in session | 7 |
| Information sharing with mum | 4 |
| Support with unexpected call anxiety | 4 |
| Support to prepare for next session | 2 |
