# Supplementary material for: Adapting Safety Planning for Autistic Adults with Trauma Histories: A Thematic Analysis from a UK Community Service
Source: Research Square preprint supplement (doi:10.21203/rs.3.rs-6602818/v1), 2025-06-18
Supplement: Supplementary file 2 [file 82970f67c8e4cc611cd558f3.xlsx]

## Sheet: codes
name		groundedness
AA camera off		7
Additional session		12
Anxiety Surrounding Session
Anxiety Surrounding Session: Anxiety		7
Anxiety Surrounding Session: Anxiety of being discharged		1
Anxiety Surrounding Session: Anxious to cancel session 2nd time		1
Anxiety Surrounding Session: Overwhelm		19
Anxiety with calls / TC		9
Appt time preference		7
ASC explored		11
ASC strategies		1
ASC support used by client		2
Client discussed ASC diagnosis		10
Client Goals
Client Goals: Desire to be 'normal'		3
Client Goals: Desire to understand self		4
Clinician low volume (noise sensitive)		1
Clinician with understanding of trauma and ND		2
Communication Differences		0
Communication Differences: Communication challenges		8
Communication Differences: Contact/Info share with mum		5
Communication Differences: Difficulty expressing self		3
Communication Differences: Direct language		3
Communication Differences: Need clear communication		1
Communication Differences: Requested slow pace		3
Communication Differences: Social engagement difficulties		25
Cyclical mood/menstrual cycle		6
Denied crisis team as unhelpful in past		1
Difficulty engaging in session		7
Difficulty identifying/understanding emotion		8
ECS group concerns/anxiety		6
Extended session		1
F2F concerns		1
Flexibility with appts		2
Flexibility with platform		6
Forget/Late to Session		5
Information processing		17
Linked observations to ASC		9
Masking		6
Overstimulation		5
Planned to reschedule session as felt drained		1
Prefer AA		1
Prefer clinician experienced in ND		2
Prefer clinician with similar background		1
Prefer female clinician		8
Prefers F2F		13
Prefer TC		6
Provided reassurance		8
Request to bring support doll to manage anxiety		1
Rescheduled session		8
Service Referral / Support
Service Referral / Support: Support with Crown Hub		3
Service Referral / Support: Support with DV		2
Service Referral / Support: Support with GP		4
Service Referral / Support: Support with health referral		1
Service Referral / Support: Support with RASA		1
Service Referral / Support: Support with services		4
Service Referral / Support: Support with social worker		1
Session Impact
Session Impact: Anxiety before session		2
Session Impact: Anxiety in session		3
Session Impact: Apologised for becoming upset		1
Session Impact: Discontinue with safety plan		1
Session Impact: Dissatisfied / Found SP unhelpful		2
Session Impact: Emotional in session		4
Session Impact: Felt drained by end of session		2
Session Impact: Need support following session		2
Session Impact: Trauma dug up		2
Session Impact: Triggered after session		6
Session Impact: Triggered in session		2
Shortened session		6
Social Support / Belonging
Social Support / Belonging: Feels don't belong		5
Social Support / Belonging: Isolation		6
Social Support / Belonging: Struggle with relationships		5
Support for engagement		24
Support to prepare for next session		2
Support with ASC form/referral		18
Support with masking		3
Support with ND clinician preference		1
Support with overwhelm		4
Support with unexpected call anxiety		4
Support with Uni/Work
Support with Uni/Work: Support with employment		3
Support with Uni/Work: Support with uni		4
Thinking Patterns
Thinking Patterns: Hears voice		10
Thinking Patterns: Rumination		7
Third party support in session		7
Uncomfortable with sharing		2

## Sheet: quotations
document	quotation	codes	comment
Clinician ASC / Support	Flexibility in case of new job	Flexibility with appts
Clinician ASC / Support	preference for female clinician	Prefer female clinician
Clinician ASC / Support	'inntate trauma responses complicated by ADHD
Clinician ASC / Support	Getting out and social engagement difficulties.	Communication Differences: Social engagement difficulties, Social Support / Belonging: Isolation
Clinician ASC / Support	Offered TC instead of F2F if low in mood	Flexibility with platform
Clinician ASC / Support	Noted observation of guilt, shame and unfulfilment, possibly linked to ASC.	Linked observations to ASC
Clinician ASC / Support	hears voices	Thinking Patterns: Hears voice
Clinician ASC / Support	support with T2D,	Service Referral / Support: Support with health referral
Clinician ASC / Support	letter to GP for support	Service Referral / Support: Support with GP
Clinician ASC / Support	Crown Hub info	Service Referral / Support: Support with Crown Hub
Clinician ASC / Support	F2F appts to be out of school hours as he struggles with socials	Flexibility with appts, Appt time preference
Clinician ASC / Support	F2F	Prefers F2F
Clinician ASC / Support	Exploration of ASC	ASC explored
Clinician ASC / Support	I agreed i would get in touch with RASA to find out if she is on a therapy waiting list. Completed referral for her.	Service Referral / Support: Support with RASA
Clinician ASC / Support	We spoke about giving others the opportunity to be there for us instead of deciding on their behalf that we are a burden for them
Clinician ASC / Support	would like support for trauma with a therapist with understanding of how this interacts with her neurodivergence.	Clinician with understanding of trauma and ND
Clinician ASC / Support	Prefer female	Prefer female clinician
Clinician ASC / Support	early afternoon appts	Appt time preference
Clinician ASC / Support	Eleanor spoke about her ASC diagnosis	Client discussed ASC diagnosis
Clinician ASC / Support	Eleanor spoke about her ASC diagnosis and how she tries to always stay positive and masking	Masking
Clinician ASC / Support	We discussed the importance of letting ourselves feel sad at times to process our struggles as it can be exhausting to always be positive	Support with masking
Clinician ASC / Support	feeling very down and exhausted from masking and trying to be positive	Masking
Clinician ASC / Support	feeling very down and exhausted from masking and trying to be positive. I reassured her and offered extra session to go through those specific things to support her while encouraging her to use the strategies learned during ESM group.	Support with masking
Clinician ASC / Support	S3 - feeling very down and exhausted from masking and trying to be positive. I reassured her and offered extra session to go through those specific things to support her while encouraging her to use the strategies learned during ESM group	Additional session
Clinician ASC / Support	Discussed the need to sit with our feelings to process them to prevent them from bottling up and overwhelming us instead of pushing to be positive so we said to set some worry time once she feels calmer.	Support with overwhelm
Clinician ASC / Support	Spoke for 30 mins	Shortened session
Clinician ASC / Support	scheduled two more sessions	Additional session
Clinician ASC / Support	Sent over some sections of SP for client to think about during the week to ease discussion.	Support to prepare for next session, Support for engagement
Clinician ASC / Support	Rescheduled once	Rescheduled session
Clinician ASC / Support	Offered additional sessions to support ASC difficulties like masking following distressing social incident.	Communication Differences: Social engagement difficulties
Clinician ASC / Support	struggles to speak to and sometimes be around people;	Communication Differences: Social engagement difficulties, Communication Differences: Communication challenges, Social Support / Belonging: Isolation
Clinician ASC / Support	overwhelm	Anxiety Surrounding Session: Overwhelm
Clinician ASC / Support	Discussed need to process feelings to prevent overwhelm (e.g. worry time).	Support with overwhelm
Clinician ASC / Support	We agreed that clinicians would first contact her by email so she can prepare herself for calls or have them scheduled in advance so she can avoid feeling paralysed.	Support with unexpected call anxiety
Clinician ASC / Support	Julie said that she could attend F2F sessions. However, she may have difficulties to express herself at times	Communication Differences: Difficulty expressing self, F2F concerns
Clinician ASC / Support	cannot pick up calls if she is not expecting them.	Anxiety with calls / TC
Clinician ASC / Support	However, she may have difficulties to express herself at times and cannot pick up calls if she is not expecting them
Clinician ASC / Support	cannot pick up calls if she is not expecting them	Anxiety with calls / TC
Clinician ASC / Support	During the session, Julie appeared emotional and still had difficulties with expressing herself at times	Session Impact: Emotional in session
Clinician ASC / Support	she identified her main goal as to "be able to do normal things like everyone else".	Client Goals: Desire to be 'normal'
Clinician ASC / Support	We discussed Crown Hub support and we agreed that we would complete a referral so we extended the session an extra 20 minutes for this purpose	Service Referral / Support: Support with Crown Hub
Clinician ASC / Support	We discussed Crown Hub support and we agreed that we would complete a referral so we extended the session an extra 20 minutes for this purpose.	Extended session
Clinician ASC / Support	In line with Julie"s concerns about her current social worker who does not provide information that Julie requests, I sent her a link to LCC complaints if she thought this could help.	Service Referral / Support: Support with social worker
Clinician ASC / Support	Additional session for service referral (Crown Hub)	Additional session
Clinician ASC / Support	Rescheduled once	Rescheduled session
Clinician ASC / Support	uiet during group, talkative in 1:1	ECS group concerns/anxiety
Clinician ASC / Support	Prerence for afternoon sessions,	Appt time preference
Clinician ASC / Support	struggles making friends	Communication Differences: Social engagement difficulties, Social Support / Belonging: Struggle with relationships
Clinician ASC / Support	difficulties maintaining relationships and jobs	Communication Differences: Social engagement difficulties, Social Support / Belonging: Struggle with relationships
Clinician ASC / Support	identifying / understanding her emotion	Difficulty identifying/understanding emotion
Clinician ASC / Support	MARAC completed, support/advice with court case and DV,	Service Referral / Support: Support with DV
Clinician ASC / Support	Preference for F2F.	Prefers F2F
Clinician ASC / Support	I suggested to reschedule the session and she agreed as she didn"t think she would be very engaged throughout if we went ahead. I reminded her that she can contact us before the session to reschedule.	Rescheduled session, Difficulty engaging in session, Support for engagement
Clinician ASC / Support	S4 - forgot about session, 15 mins late. Felt drained, ended session early; scheduled another	Rescheduled session, Shortened session, Anxiety Surrounding Session: Overwhelm, Forget/Late to Session
Clinician ASC / Support	can become non-verbal in stressful situations	Communication Differences: Social engagement difficulties, Communication Differences: Communication challenges
Clinician ASC / Support	isolation	Communication Differences: Social engagement difficulties, Social Support / Belonging: Isolation
Clinician ASC / Support	Preference for someone with experience in neurodiversity	Prefer clinician experienced in ND
Clinician ASC / Support	Sammi requested that we take things slow due to information processing	Communication Differences: Requested slow pace
Clinician ASC / Support	Sammi requested that we take things slow due to information processing.	Information processing
Clinician ASC / Support	Note to be made on file with request for clinician familiarity with ND.	Support with ND clinician preference
Clinician ASC / Support	Advised in initial assessment can invite partner/PA to join sessions to support engagement.	Third party support in session
Clinician ASC / Support	dvised in initial assessment can invite partner/PA to join sessions to support engagement.	Support for engagement, Third party support in session
Clinician ASC / Support	I suggested to reschedule the session and she agreed as she didn"t think she would be very engaged throughout if we went ahead. I reminded her that she can contact us before the session to reschedule.,
Clinician ASC / Support	S1 - after explaining content of safety plan, Sammi felt overwhelmed and questioned if felt ready to engage;	Difficulty engaging in session, Anxiety Surrounding Session: Overwhelm, Information processing
Clinician ASC / Support	felt uncomfortable exposing herself/talking about history with someone she just met	Uncomfortable with sharing
Clinician ASC / Support	I gently assured Sammi that we wouldn"t need to delve into past history and safety plan was a document to capture current circumstances, mood/emotions etc, history may come up at some point, but is not the focus.	Provided reassurance
Clinician ASC / Support	I gently assured Sammi that we wouldn"t need to delve into past history and safety plan was a document to capture current circumstances, mood/emotions etc, history may come up at some point, but is not the focus. After that conversation, Sammi felt able to engage and she did so very well throughout.	Support for engagement, Provided reassurance
Clinician ASC / Support	Sammi requested that we take things slow due to information processing.	Communication Differences: Requested slow pace, Information processing
Clinician ASC / Support	came into APPT heightened/triggered and stated did not wish to continue with session/safety planning because of how it left her feeling after first session	Anxiety Surrounding Session: Overwhelm, Session Impact: Triggered after session
Clinician ASC / Support	had not self harmed in a long time but then started again two days after first safety planning session togethe	Session Impact: Triggered after session
Clinician ASC / Support	feels the safety plan is a tick box exercise and not helpful for her; feels its just an information gathering system that we have in place and do nothing with;	Session Impact: Dissatisfied / Found SP unhelpful
Clinician ASC / Support	expressed "being sick of" repeating herself to mental health professionals and feels like a guinea pig for assistants/trainees who don"t know enough about her experiences.	Prefer clinician experienced in ND, Clinician with understanding of trauma and ND
Clinician ASC / Support	expressed "being sick of" repeating herself to mental health professionals and feels like a guinea pig for assistants/trainees who don"t know enough about her experiences. Stated is at "rock bottom" and how there "isn"t anywhere else to go from here"; will "go further than rock bottom, and the only other place than rock bottom is to kill herself".	Session Impact: Triggered after session
Clinician ASC / Support	Throughout Sammi"s distress, I gained permission from her for Dr Thomas Speight to join our call for further support; asked Sammi to explain what she had been feeling in her own words; Sammi became further heightened as I had asked her to repeat herself; then closed the laptop (without ending the call) and left.	Anxiety Surrounding Session: Overwhelm, Information processing, Difficulty engaging in session, Session Impact: Emotional in session
Clinician ASC / Support	asked Sammi to explain what she had been feeling in her own words; Sammi became further heightened as I had asked her to repeat herself;	Session Impact: Triggered in session
Clinician ASC / Support	ammi became further heightened as I had asked her to repeat herself; then closed the laptop (without ending the call) and left.	Session Impact: Triggered in session
Clinician ASC / Support	Tom and I remained on call for a few minutes, sent message using AA platform to let her know we would wait around for a few minutes before terminating call; Sammi didn"t return so call was terminated; Tom attempted to call Sammi, no answer voicemail left. Tom then got through on call; Sammi expressed worry being discharged as not completing SP - Tom assured would not be discharged for being unabl…	Support for engagement
Clinician ASC / Support	Sammi expressed worry being discharged as not completing SP	Anxiety Surrounding Session: Anxiety of being discharged
Clinician ASC / Support	SP follow up with AP - suggested to discuss with next practitioner how they can adjust sessions given ASC needs.	Support for engagement
Clinician ASC / Support	Tom assured would not be discharged for being unable to engage in SP	Provided reassurance
Clinician ASC / Support	Nicola has informed she will bring a reborn doll to the sessions, as it helps her with the anxiety.	Request to bring support doll to manage anxiety
Clinician ASC / Support	Nicola has informed she will bring a reborn doll to the sessions, as it helps her with the anxiety.	Anxiety Surrounding Session: Anxiety
Clinician ASC / Support	Nic apologised about becoming upset during the session,	Session Impact: Emotional in session
Clinician ASC / Support	Nic apologised about becoming upset during the session, we offered reassurance around this	Provided reassurance
Clinician ASC / Support	Nicola declined safety planning, due to not feeling up to it.	Difficulty engaging in session
Clinician ASC / Support	Additional sessions,	Additional session
Clinician ASC / Support	Preference for F2F	Prefers F2F
Clinician ASC / Support	Direct questions (no abstract/complex examples)	Communication Differences: Direct language
Clinician ASC / Support	hears male voice to self-harm	Thinking Patterns: Hears voice
Clinician ASC / Support	panic attacks in overstimulating environments (noise and people)	Overstimulation
Clinician ASC / Support	can become non-verbal in stressful situations,	Overstimulation
Clinician ASC / Support	struggles to speak to and sometimes be around people	Overstimulation
Clinician ASC / Support	hears male voice to end life,	Thinking Patterns: Hears voice
Clinician ASC / Support	struggle expressing self	Communication Differences: Difficulty expressing self
Clinician ASC / Support	feels no emotion	Difficulty identifying/understanding emotion
Clinician ASC / Support	Heidi asked me if I thought how she was feeling was "normal",	Client Goals: Desire to be 'normal'
Clinician ASC / Support	Heidi asked me if I thought how she was feeling was "normal", validation and reassurance given and was accepted well.	Provided reassurance
Clinician ASC / Support	hears male voice	Thinking Patterns: Hears voice
Clinician ASC / Support	provided Faith with contact information to SF and if difficulties in joining the session.	Support for engagement
Clinician ASC / Support	Requested requirements: For friend to join SP sessions	Third party support in session
Clinician ASC / Support	asked if I could explain a little about the safety plan	Information processing
Clinician ASC / Support	Expressed goal for better understanding of why brain functions the way it does
Clinician ASC / Support	S1 - after around 20 minutes on the session, Faith turned on her camera and reassurance was offered	AA camera off
Clinician ASC / Support	S1 - after around 20 minutes on the session, Faith turned on her camera and reassurance was offered.	Provided reassurance
Clinician ASC / Support	Faith said she understood the reason for completing a safety plan and was happy to do so	Support for engagement
Clinician ASC / Support	I made Faith aware that if she wishes Dillion to be part of her next sessions this would be acceptable.	Support for engagement, Third party support in session
Clinician ASC / Support	S2 and S3 - Faith had her microphone on throughout, however did not have her camera on	AA camera off
Clinician ASC / Support	masking	Masking
Clinician ASC / Support	overwhelm	Anxiety Surrounding Session: Overwhelm
Clinician ASC / Support	difficulty understanding emotions	Difficulty identifying/understanding emotion
Clinician ASC / Support	assessment - sent info on charity that helps people with autism secure employment	Support with Uni/Work: Support with employment
Clinician ASC / Support	Prefer face-to-face appointments, or if this is not possible telephone (not Attend Anywhere)	Prefers F2F
Clinician ASC / Support	She would also prefer a female clinician.	Prefer female clinician
Clinician ASC / Support	Requested that clinicians text or email her prior to contacting her as she does not answer calls from withheld numbers	Support for engagement, Anxiety with calls / TC
Clinician ASC / Support	Offered F2F or TC	Flexibility with platform
Clinician ASC / Support	S1- attended AA with microphone on and camera off. Rose mentioned by email she would like to keep her camera off as she does not feel comfortable.	AA camera off, Session Impact: Anxiety in session
Clinician ASC / Support	Client discussed ASC masking	Masking
Clinician ASC / Support	feels "don't belong here",	Social Support / Belonging: Feels don't belong
Clinician ASC / Support	S1- stated would like F2F appointments, however we agreed to have this first session via T/C and see how she felt	Prefers F2F
Clinician ASC / Support	Contact with mum r.e. SP	Communication Differences: Contact/Info share with mum, Support for engagement
Clinician ASC / Support	offered 1 more session to complete safety plan	Additional session
Clinician ASC / Support	hears voice,	Thinking Patterns: Hears voice
Clinician ASC / Support	cyclical mood	Cyclical mood/menstrual cycle
Clinician ASC / Support	cyclic mood,	Cyclical mood/menstrual cycle
Clinician ASC / Support	mum accompanied (waited outside).For future appointments within service, Ava has requested to contact her mum by telephone or email.	Support for engagement, Communication Differences: Contact/Info share with mum
Clinician ASC / Support	TC to Ava"s mum as I could not reach Ava last week after two attempts	Support for engagement, Communication Differences: Contact/Info share with mum
Clinician ASC / Support	TC to Ava"s mum as I could not reach Ava last week after two attempts. Diane has mentioned Ava"s does not pick up her phone if she does not know the number.	Anxiety with calls / TC
Clinician ASC / Support	S1- She explained she was not sociable and always felt different, and stated secondary school was horrible for her.	Social Support / Belonging: Feels don't belong, Communication Differences: Social engagement difficulties
Clinician ASC / Support	We talked her about her ASD diagnosis, which might explained this feeling	Linked observations to ASC, ASC explored, Client discussed ASC diagnosis
Clinician ASC / Support	social difficulties	Communication Differences: Social engagement difficulties
Clinician ASC / Support	Additional sessions,	Additional session
Clinician ASC / Support	ASC education.	ASC explored
Clinician ASC / Support	Help with ASC form,	Support with ASC form/referral
Clinician ASC / Support	Requested female clinician (not provided),	Prefer female clinician
Clinician ASC / Support	Female, more comfortable discussing certain topics,	Prefer female clinician
Clinician ASC / Support	S2 - explored ADHD diagnosis and if client had also had ASC assessment, explored ASC traits and benefit of getting ASC assessment; offered support with this if needed.	Support with ASC form/referral, Linked observations to ASC, ASC explored
Clinician ASC / Support	1 - explored menstrual cycle impact	Cyclical mood/menstrual cycle
Clinician ASC / Support	GP support.	Service Referral / Support: Support with GP
Clinician ASC / Support	Extra session to complete MARAC/MeRIT.	Service Referral / Support: Support with DV, Additional session
Clinician ASC / Support	overwhelm	Anxiety Surrounding Session: Overwhelm
Clinician ASC / Support	difficulties with relationships,	Communication Differences: Social engagement difficulties, Social Support / Belonging: Struggle with relationships
Clinician ASC / Support	MeRIT and Crown St Hub assessments	Service Referral / Support: Support with Crown Hub
Clinician ASC / Support	Preferred TC for long term therapy,	Prefer TC
Clinician ASC / Support	Support letter for uni extensions,	Support with Uni/Work: Support with uni
Clinician ASC / Support	Provided supporting letter for uni extensions.	Support with Uni/Work: Support with uni
Clinician ASC / Support	social difficulties	Communication Differences: Social engagement difficulties
Clinician ASC / Support	Preference for female clinician. Wanted next clinician to know he had been sexually abused so they wouldn"t be triggered if he mentioned this	Prefer female clinician
Clinician ASC / Support	Several attempts made to contact via email and phone to request completes outcome measures.	Support for engagement, Difficulty engaging in session
Clinician ASC / Support	S1 - Discussed potential referral to ED service. Three separate calls to finish session. Offered to do outcome measures together during session.	Support for engagement, Difficulty engaging in session, Flexibility with platform
Clinician ASC / Support	poke about confirmation biased and perception of events depending on our current mood. agreed that he could try to complete a thought diary of things that inconvenience him every day but that are not "catastrophic" to understand impact of mood on perceptions	ASC explored
Clinician ASC / Support	Rescheduled once	Rescheduled session
Clinician ASC / Support	rumination	Thinking Patterns: Rumination
Clinician ASC / Support	expressing emotions	Difficulty identifying/understanding emotion, Communication Differences: Difficulty expressing self
Clinician ASC / Support	sent details for Liverpool Bereavement Service and Citizens Advice Bureau
Clinician ASC / Support	SMART goals guide for overwhelm	Anxiety Surrounding Session: Overwhelm
Clinician ASC / Support	Discussed to request T/C or A/A to avoid pressure of getting somewhere in time if not feeling well.	Prefer TC, Flexibility with platform, Anxiety Surrounding Session: Overwhelm, Anxiety Surrounding Session: Anxiety, Support for engagement
Clinician ASC / Support	Stated may need to reschedule appointments around daughter"s school/sickness.	Appt time preference
Clinician ASC / Support	Stated period can have impact on her would prefer a female clinician.	Prefer female clinician, Cyclical mood/menstrual cycle
Clinician ASC / Support	discussed possibility of partner attending F&F group	Support for engagement, Third party support in session
Clinician ASC / Support	Rescheduled once	Rescheduled session
Clinician ASC / Support	Suggested to take break after session before work	Anxiety Surrounding Session: Overwhelm
Clinician ASC / Support	Rescheduled once	Rescheduled session
Clinician ASC / Support	taking things literally,	Communication Differences: Social engagement difficulties, Information processing, Communication Differences: Direct language, Communication Differences: Communication challenges
Clinician ASC / Support	overwhelm	Anxiety Surrounding Session: Overwhelm
Clinician ASC / Support	difficulties understanding others	Communication Differences: Social engagement difficulties, Information processing, Difficulty identifying/understanding emotion
Clinician ASC / Support	period heavily impacts mood and suic idea,	Cyclical mood/menstrual cycle
Clinician ASC / Support	Offered: Info on self-compassion, boundaries, relationship between menstrual cycles and mental health, and self-care inventory. self-help tool for menstrual cycles,	Cyclical mood/menstrual cycle
Clinician ASC / Support	info for Liverpool Bereavement Service, Carer�s Allowance and Citizens Advice Bureau for support with applications	Service Referral / Support: Support with services
Clinician ASC / Support	ent details for Liverpool Bereavement Service and Citizens Advice Bureau.	Service Referral / Support: Support with services
Clinician ASC / Support	Discussed boundaries and effective communication	Communication Differences: Social engagement difficulties, Communication Differences: Communication challenges
Clinician ASC / Support	Emailed requesting call back as had troubles self-referring with Liverpool Bereavement Service - clinician spoke to her and called service to enquire.	Service Referral / Support: Support with services
Clinician ASC / Support	feeling abandoned and rejected, different all life	Social Support / Belonging: Feels don't belong
Clinician ASC / Support	various unanswered calls/emails,	Forget/Late to Session
Clinician ASC / Support	suggested to contact GP for ASC referral	Service Referral / Support: Support with GP, Support with ASC form/referral, ASC explored
Clinician ASC / Support	support with ASC referral if needed	Support with ASC form/referral
Clinician ASC / Support	given additional opportunities to attend sessions from opt-in to calling back to not miss appt,	Support for engagement, Additional session
Clinician ASC / Support	struggles with communicating, social situations	Communication Differences: Social engagement difficulties, Communication Differences: Communication challenges
Clinician ASC / Support	hearing voices	Thinking Patterns: Hears voice
Clinician ASC / Support	We agreed that I would check about the ASC diagnosis pathway.	Support with ASC form/referral
Clinician ASC / Support	Karolina emailed to request a support letter for university as she is feeling overwhelmed to complete her assignments. I sent a letter to her and also attached handouts to manage energy levels	Support with Uni/Work: Support with uni, Support with overwhelm, Anxiety Surrounding Session: Overwhelm
Clinician ASC / Support	May want partner to attend some SP sessions	Third party support in session
Clinician ASC / Support	Prefer TC appointments in afternoon.	Prefer TC, Appt time preference
Clinician ASC / Support	Asked that her clinician doesn't speak too loud as is sensitive to noises	Clinician low volume (noise sensitive)
Clinician ASC / Support	be sent reminders for sessions,	Support for engagement, Forget/Late to Session
Clinician ASC / Support	Asked that her clinician doesn't speak too loud as is sensitive to noises, be sent reminders for sessions, and have patience with her as she can take some time to interact in conversations (may ask to repeat question, may stay in silence while searching for an answer, may be mostly quiet but engaged)	Support for engagement, Information processing, Communication Differences: Requested slow pace
Clinician ASC / Support	She did not turn her camera on and couldn't hear me - I phoned her during AA and kept my camera on	AA camera off
Clinician ASC / Support	preference for TC in morning	Prefer TC, Appt time preference
Clinician ASC / Support	Explored ASC referral; discussed managing sensory overload.	ASC explored, Support with overwhelm
Clinician ASC / Support	Explored ASC referral;	ASC explored, Support with ASC form/referral
Clinician ASC / Support	Struggles to identify and understand emotions	Difficulty identifying/understanding emotion
Clinician ASC / Support	previous self-harm; particuarly related to relationship breakdowns	Communication Differences: Social engagement difficulties, Social Support / Belonging: Struggle with relationships
Clinician ASC / Support	Group ECS intervention was suggested to him but he declined shared he would not function well in a group.	ECS group concerns/anxiety, Communication Differences: Social engagement difficulties
Clinician ASC / Support	struggles to let go of things	Thinking Patterns: Rumination
Clinician ASC / Support	isolation,	Communication Differences: Social engagement difficulties, Social Support / Belonging: Isolation
Clinician ASC / Support	Call from Ellie's mum to opt-in, consent obtained from Ellie who was in the background to discuss with mum. Ellie has anxiety with phone calls and feels unable to make them herself but can manage to receive them	Anxiety Surrounding Session: Anxiety, Anxiety with calls / TC, Support with unexpected call anxiety, Communication Differences: Contact/Info share with mum
Clinician ASC / Support	Ellie has anxiety with phone calls and feels unable to make them herself but can manage to receive them, she therefore wanted Face-to-face initially but once I had explained this would incur a delay to due to room shortages, she agreed to a telephone assessment.	Prefers F2F, Anxiety with calls / TC
Clinician ASC / Support	hears voice,	Thinking Patterns: Hears voice
Clinician ASC / Support	assessment - made referral for ASC as requested	Support with ASC form/referral
Clinician ASC / Support	preference for F2F - find telephone and online appointments triggering	Prefers F2F, Anxiety with calls / TC
Clinician ASC / Support	assessment - made referral for ASC as requested. preference for F2F - find telephone and online appointments triggering.,	Support with unexpected call anxiety
Clinician ASC / Support	hears voices,	Thinking Patterns: Hears voice
Clinician ASC / Support	feeling an outsider throughout life and struggling to form relationships	Communication Differences: Social engagement difficulties, Social Support / Belonging: Feels don't belong, Social Support / Belonging: Struggle with relationships
Clinician ASC / Support	sensory sensitivity	Overstimulation
Clinician ASC / Support	Assessment - I will also contact her student support services to highlight the extent of her difficulties recently and advocate on her behalf.	Support with Uni/Work: Support with uni
Clinician ASC / Support	preference for F2F sessions,	Prefers F2F
Clinician ASC / Support	difficulties understanding emotion	Difficulty identifying/understanding emotion
Clinician ASC / Support	sent email with link of a box with a key (as she wasn"t sure what I meant about this).	Information processing
Clinician ASC / Support	Assessment - prefer sessions via phone or online and she struggles to make eye contact in person and finds she can stutter which can increase anxiety	Communication Differences: Social engagement difficulties, Anxiety Surrounding Session: Anxiety, Prefer TC, Prefer AA, Communication Differences: Communication challenges
Clinician ASC / Support	S2-We talked about trying the alternatives to SH a few times before deciding which ones could help, as our brain needs time to process changes	Information processing
Clinician ASC / Support	I prompted Lucy to reflect on this question and suggested she can ask her boyfriend to help her with this.	Information processing, Support for engagement, Support to prepare for next session, Third party support in session
Clinician ASC / Support	rumination	Thinking Patterns: Rumination
Clinician ASC / Support	hears voice	Thinking Patterns: Hears voice
Clinician ASC / Support	difficult body sensations	Overstimulation
Clinician ASC / Support	helped with ASC referral - help filling in form and clinician making referral	Support with ASC form/referral
Clinician ASC / Support	Would like female from a similar background to do her sessions	Prefer female clinician, Prefer clinician with similar background
Clinician ASC / Support	Would prefer F2F on a Thursday.	Prefers F2F, Appt time preference
Clinician ASC / Support	S1 -stated a letter from our team explaining her difficulties and requesting support by her work could help her. S2- she would like a summary letter of her difficulties and the plan within our team, as a proof of the referral, the work and the future plan to work on her mental health.	Support with Uni/Work: Support with employment
Clinician ASC / Support	Letter for work support,
Clinician ASC / Support	S3 -Leilah mentioned she thinks she can have an undiagnosed autism. We agreed we were going to fill the ASC form together and I was going to send a referral to the ASC diagnose team.	Support with ASC form/referral, ASC explored, Client discussed ASC diagnosis
Clinician ASC / Support	Additional session to do ASC form	Additional session
Clinician ASC / Support	One session to do the ASC form	Additional session
Clinician ASC / Support	has cancelled 2 sessions	Rescheduled session
Clinician ASC / Support	Go through ASC form with her, make referral,	Support with ASC form/referral
Clinician ASC / Support	Emma has requested a referral for a ASC assessment by our team	Client discussed ASC diagnosis
Clinician ASC / Support	offered AA and TC	Flexibility with platform
Clinician ASC / Support	Booked 2 more sessions to complete SP	Additional session
Clinician ASC / Support	GP re-referred: Cameron is a very complex and troubled young man who struggles to communicate and engage in a face-to-face consultation. I do not think a group zoom meeting is appropriate for him and he will not engage with this.I would be grateful if he could be seen face for face for an appointment and therapy.	Support for engagement, Service Referral / Support: Support with GP, Communication Differences: Social engagement difficulties, ECS group concerns/anxiety, Communication Differences: Communication challenges
Clinician ASC / Support	social difficulties, isolation	Communication Differences: Social engagement difficulties, Social Support / Belonging: Isolation
Clinician ASC / Support	catastrophising	Thinking Patterns: Rumination
Clinician ASC / Support	Go through ASC form together in SP S3, make referral	Support with ASC form/referral
Clinician ASC / Support	Cameron said he was unsure about the group due to anxiety which we normalised and he said he would like to try this. We discussed that he can change his mind and be offered individual sessions if he would prefer if he lets us know.	ECS group concerns/anxiety, Provided reassurance, Anxiety Surrounding Session: Anxiety
Clinician ASC / Support	gave consent for information to be shared with his mother	Communication Differences: Contact/Info share with mum
Clinician ASC / Support	Cameron is happy to try video consultation, however, we agreed to do F2F if needed	Prefers F2F, Flexibility with platform
Clinician ASC / Support	S1 - It was a bit difficult for Cameron to recognise the differences and the emotions/feelings linked to each mood	Difficulty identifying/understanding emotion
Clinician ASC / Support	S2 - camera off, mic on.	AA camera off
Clinician ASC / Support	It was a bit hard for Cameron to think about alternatives and different points of view/thinking.	Information processing
Clinician ASC / Support	While Cameron was talking about his difficulties, I linked a lot of them with autism. I also thought about this during our first session, I noticed a disfluency in his speech and a slower processing speed. I explored this and discussed my observations with Cameron. Cameron stated "I am definitely in the spectrum". We discussed the pros of having an assessment. Cameron is happy to be referred to t…	ASC explored, Support with ASC form/referral, Linked observations to ASC
Clinician ASC / Support	S3 - cam off mic on.	AA camera off
Clinician ASC / Support	I noticed a disfluency in his speech and a slower processing speed	Communication Differences: Social engagement difficulties, Information processing, Communication Differences: Communication challenges
Clinician ASC / Support	Emailed asking about 1:1 rather than group - info provided on group and option to request 1:1	ECS group concerns/anxiety
Clinician ASC / Support	hears male voice derogatory or comforting female voice,	Thinking Patterns: Hears voice
Clinician ASC / Support	overwhelm	Anxiety Surrounding Session: Overwhelm
Clinician ASC / Support	Emailed after S3 - I forgot about the appointment however i thought someone would phone me when i wasn�t on the video call.	Forget/Late to Session
Clinician ASC / Support	I also was wondering how after these sessions what happens because last weeks session proved to be quite a lot for me and i�m just worried that this last session is all i get from your service and i don�t think it�s helped just having three sessions.	Session Impact: Triggered after session, Anxiety Surrounding Session: Overwhelm, Session Impact: Dissatisfied / Found SP unhelpful
Clinician ASC / Support	S3 - mic on cam off. S4 - mic on cam off.	AA camera off
Clinician ASC / Support	Recent DSH - I shared a "relapse graphic" to pinpoint the recovery journal and the relapse stage on the process of change.	Information processing
Clinician ASC / Support	S5 DNA - I don�t want to count this as a missed appointment and step you down from the service, so could you please just answer the last questions of the safety plan by responding to this email?	Support for engagement
Clinician ASC / Support	Provided info on group ECS and how to request 1:1.	Support for engagement
Clinician ASC / Support	social difficulties,	Communication Differences: Social engagement difficulties
Clinician ASC / Support	, overwhelm	Anxiety Surrounding Session: Overwhelm
Clinician ASC / Support	racing thoughts	Thinking Patterns: Rumination
Clinician ASC / Support	Sent visual of hope box.	Information processing
Clinician ASC / Support	social difficulties, isolation,	Communication Differences: Social engagement difficulties, Social Support / Belonging: Isolation
Clinician ASC / Support	obsessive	Thinking Patterns: Rumination
Clinician ASC / Support	overwhelm	Anxiety Surrounding Session: Overwhelm
Clinician ASC / Support	S1 - I did psychoeducation around the threat responses and dissociation. Carol stated "that is what happens to me", she mentioned this information helped her to make sense to her difficulties.	Client Goals: Desire to understand self, Information processing
Clinician ASC / Support	requested F2F	Prefers F2F
Clinician ASC / Support	Checked before SP - happy to have SP over phone but therapy F2F.	Prefers F2F
Clinician ASC / Support	S1 - re-referred to Life rooms.	Service Referral / Support: Support with services
Clinician ASC / Support	S2 - planned to fill out ASC form together, but after 3 DNA this did not happen.	Support with ASC form/referral
Clinician ASC / Support	Mode Pref: F2F,	Prefers F2F
Clinician ASC / Support	Additional session to do ASC form and referral.	Support with ASC form/referral, Additional session
Clinician ASC / Support	Shortened session due to anxiety.	Shortened session, Session Impact: Anxiety in session, Anxiety Surrounding Session: Anxiety
Clinician ASC / Support	S1 - offered 30 min call due to anxiety of long phone call. Asked about client's cats to reduce anxiety.	Shortened session, Anxiety with calls / TC, Support with unexpected call anxiety
Clinician ASC / Support	Clinician suspected potential ASC (Georgia),	Linked observations to ASC
Clinician ASC / Support	Swapped to T/C as too anxious for f2f	Prefer TC, Anxiety Surrounding Session: Anxiety, Session Impact: Anxiety in session
Client ASC Difficulties/Concerns	Stated found group ECS uncomfortable, struggled with long sessions, maintaining focus	ECS group concerns/anxiety
Client ASC Difficulties/Concerns	Expressed 'doesn't know how to be part of the world sometimes'.	Social Support / Belonging: Feels don't belong
Client ASC Difficulties/Concerns	Spoke about diagnosis and masking.	Client discussed ASC diagnosis, Masking
Client ASC Difficulties/Concerns	Planned to explain to partners about different perception due to ASC.	Support with masking
Client ASC Difficulties/Concerns	S3 - distressed, expressed aversion to cancelling session 2nd time	Session Impact: Anxiety before session, Forget/Late to Session
Client ASC Difficulties/Concerns	Expressed need for clear communication	Communication Differences: Direct language, Communication Differences: Need clear communication
Client ASC Difficulties/Concerns	S3 - discussed sensory tools	ASC support used by client
Client ASC Difficulties/Concerns	S4 - felt drained by end of session.	Difficulty engaging in session
Client ASC Difficulties/Concerns	S4 - felt drained by end of session	Session Impact: Felt drained by end of session
Client ASC Difficulties/Concerns	S1 - Overwhelmed after content of safety plan explained, questioned if ready to engage.	Anxiety Surrounding Session: Overwhelm
Client ASC Difficulties/Concerns	Felt uncomfortable exposing self and history to someone just met	Uncomfortable with sharing
Client ASC Difficulties/Concerns	Follow-up call with AP - explained struggled with SP sessions - past trauma dug up, and left feeling very exposed and unstable. Wants to proceed, but needs more support to manage the increased emotional dysregulation that will follow. Happy to try to include brief SP within low intensity intervention (PIT).
Client ASC Difficulties/Concerns	explained struggled with SP sessions - past trauma dug up, and left feeling very exposed and unstable. Wants to proceed, but needs more support to manage the increased emotional dysregulation that will follow.	Session Impact: Trauma dug up
Client ASC Difficulties/Concerns	left feeling very exposed and unstable.
Client ASC Difficulties/Concerns	Happy to try to include brief SP within low intensity intervention (PIT).
Client ASC Difficulties/Concerns	after explaining content of safety plan, Sammi felt overwhelmed and questioned if felt ready to engage	Anxiety Surrounding Session: Overwhelm
Client ASC Difficulties/Concerns	expressed aversion to cancelling session 2nd time.	Anxiety Surrounding Session: Anxious to cancel session 2nd time
Client ASC Difficulties/Concerns	Stated is at "rock bottom" and how there "isn"t anywhere else to go from here"; will "go further than rock bottom, and the only other place than rock bottom is to kill herself".
Client ASC Difficulties/Concerns	feels the safety plan is a tick box exercise and not helpful for her
Client ASC Difficulties/Concerns	Nic apologised about becoming upset during the session, we offered reassurance around this Nicola declined safety planning, due to not feeling up to it.	Session Impact: Apologised for becoming upset
Client ASC Difficulties/Concerns	Heidi asked me if I thought how she was feeling was "normal"	Client Goals: Desire to be 'normal'
Client ASC Difficulties/Concerns	Heidi asked me if I thought how she was feeling was "normal", validation and reassurance given and was accepted well	Provided reassurance
Client ASC Difficulties/Concerns	Expressed goal for better understanding of why brain functions the way it does	Client Goals: Desire to understand self
Client ASC Difficulties/Concerns	she would like to keep her camera off as she does not feel comfortable. Client discussed ASC masking.	Masking
Client ASC Difficulties/Concerns	Discussed assistance dog, academic and pastoral uni support for ASC	ASC support used by client
Client ASC Difficulties/Concerns	S2 - stated had not had ASC assessment as went through Right to Choose pathway since NHS referral would have taken years. Expressed may be helpful in understanding self, could identify some traits in self. S3 - stated had completed ASC forms for referral and plans to pursue assessment .	Client discussed ASC diagnosis, Support with ASC form/referral
Client ASC Difficulties/Concerns	S2 - stated had not had ASC assessment as went through Right to Choose pathway since NHS referral would have taken years. Expressed may be helpful in understanding self, could identify some traits in self.	Client Goals: Desire to understand self, Linked observations to ASC
Client ASC Difficulties/Concerns	S1 - stated would like to receive diagnosis of ASC to have better understanding of difficulties, friends with ASC told her she displays common traits	Linked observations to ASC, Client Goals: Desire to understand self, Client discussed ASC diagnosis
Client ASC Difficulties/Concerns	Chose to end session early as nothing else wanted to speak about. Stated felt drained and initially planned to reschedule session (#3).	Session Impact: Felt drained by end of session, Planned to reschedule session as felt drained, Shortened session
Client ASC Difficulties/Concerns	Shared belief of having undiagnosed ASC. Discussed triggers and lack of support at work	Support with Uni/Work: Support with employment, ASC explored, Client discussed ASC diagnosis
Client ASC Difficulties/Concerns	When clinician offered contacting Crisis Team on client's behalf, declined and stated not helpful in the past	Denied crisis team as unhelpful in past
Client ASC Difficulties/Concerns	When I explored planning the next steps for the day, to ensure her safety Leilah became overwhelmed and it was really difficult for her to think	Anxiety Surrounding Session: Overwhelm, Information processing
Client ASC Difficulties/Concerns	S1 - stated feels might have autism as has some traits, explained was referred in the past by SF but struggled completing first questionnaire as didn't feel ready;	Linked observations to ASC, Client discussed ASC diagnosis, Support with ASC form/referral
Client ASC Difficulties/Concerns	was referred in the past by SF but struggled completing first questionnaire as didn't feel ready; requested a referral for ASC assessment by our team.	Support with ASC form/referral
Client ASC Difficulties/Concerns	I also was wondering how after these sessions what happens because last weeks session proved to be quite a lot for me and i�m just worried that this last session is all i get from your service	Session Impact: Triggered after session, Session Impact: Need support following session
Client ASC Difficulties/Concerns	fidget items, free hobbies	ASC strategies
Client ASC Difficulties/Concerns	agreed that he could try to complete a thought diary of things that inconvenience him every day but that are not "catastrophic" to understand impact of mood on perceptions	Thinking Patterns: Rumination
Client ASC Difficulties/Concerns	did not wish to continue with session/safety planning because of how it left her feeling after first session	Session Impact: Discontinue with safety plan
Client ASC Difficulties/Concerns	did not wish to continue with session/safety planning because of how it left her feeling after first session; had not self harmed in a long time but then started again two days after first safety planning session together;	Session Impact: Trauma dug up, Session Impact: Triggered after session
Client ASC Difficulties/Concerns	S1 - stated not good with technology/phones and feeling really anxious about call;	Anxiety with calls / TC
Client ASC Difficulties/Concerns	S1 - stated not good with technology/phones and feeling really anxious about call; asked how long it would take, anxious around being 1 hour over phone.	Session Impact: Anxiety before session
Client ASC Difficulties/Concerns	feeling really anxious about call; asked how long it would take, anxious around being 1 hour over phone. Agreed to 30 min session, however, felt more comfortable throughout	Shortened session
Client ASC Difficulties/Concerns	At end of session, stated thinks on ASC spectrum, was mentioned in assessment and sees traits. Stated struggles with online referral with Psychiatry UK.	Support with ASC form/referral, Client discussed ASC diagnosis, Linked observations to ASC
Client ASC Difficulties/Concerns	Tearful throughout	Session Impact: Emotional in session
Client ASC Difficulties/Concerns	Wants to proceed, but needs more support to manage the increased emotional dysregulation that will follow.	Session Impact: Need support following session
