# Supplementary material for: Adapting Safety Planning for Autistic Adults with Trauma Histories: A Thematic Analysis from a UK Community Service
Source: Research Square preprint supplement (doi:10.21203/rs.3.rs-6602818/v1), 2025-06-18
Supplement: Supplementary file 3 [file 98538a0e27212f9748bf5d4d.xlsx]

## Sheet: Sheet1
Client No.	1	2	3	4	5	6	7	8	9	10	11	12	13	14	15	16	17	18	19	20	21	22	23	24	25	26	27	28	29	30	31	32	33	34	35	36	37	38	Avg/Total
ASC Dx/Sx	D	D	D	D	D	D	D	D	D	D	D	D	D	D	D	D	D	S	S	S	S	S	S	S	S	S	S	S	S	S	S	S	S	S	S	S	S	S
Sex	M	M	F	F	M	F	F	F	F	F	F	F	F	F	M	M	F	F	F	M	F	F	F	F	F	M	F	M	F	F	F	F	F	M	F	F	F	F
Age	38.4556	44.625	23.8056	47.2917	26.9111	23.5667	40.9111	41.6167	20.2056	25.6917	22.2778	24.7667	22.8389	40.575	22.2667	38.7833	20.9028	44.7056	22.0972	26.4611	36.8944	43.4056	31.6778	21.3556	37.7139	26.275	22.3333	45.8861	22.9389	27.1194	24.1806	42.7083	32.0889	28.45	22.6611	23.6556	49.5111	55.9861	#REF!
DOB	25/11/1986	1980-09-24	2001-07-19	1978-01-24	1998-06-11	15/10/2001	1984-06-11	1983-09-27	2005-02-25	1999-08-31	2003-01-29	2000-08-03	2002-07-07	1984-10-12	2003-02-03	1986-07-27	2004-06-14	1980-08-25	2003-04-04	23/11/1998	1988-06-17	13/12/1981	1993-09-05	2004-01-01	1987-08-22	1999-01-31	2003-01-09	1979-06-20	2002-06-01	1998-03-26	2001-03-04	1982-08-24	1993-04-07	27/11/1996	2002-09-11	2001-09-13	1975-11-05	1969-05-14
Safety plan type	Full	Full	Full	Full	Flashcard	Full	Full	Full	Full	Full	Full	Full	Full	Full	Full	Full	Full	Full	Flashcard	Flashcard	Full	Full	Flashcard	Flashcard	Full	Full	Flashcard Review	Full	Full	Full	Full	Review (Full)	Full	Full	Full	Full	Full	Full
Session 1 date	2024-09-02	2024-09-23	2024-10-24	2024-10-14	2024-10-24	2024-10-30	2024-09-23	2024-09-30	2024-10-09	2024-10-22	2024-08-14	2024-07-31	2024-08-09	2024-09-12	2024-07-04	2024-08-07	2024-08-22	2024-10-24	2024-08-29	2024-08-30	2024-09-11	2024-09-23	2024-10-21	2024-10-11	2024-10-30	2024-09-05	2024-09-19	2024-09-22	2024-10-02	2024-10-31	2024-07-24	2024-08-29	2024-09-04	2024-09-04	2024-09-06	2024-10-02	2024-10-08	2024-10-11
Last session date	2024-09-09	2024-09-30	2024-10-31	2024-10-28	2024-10-31	2024-11-26	2024-10-22	2024-10-07	2024-10-25	2024-11-05	2024-08-28	2024-08-21	2024-08-30	2024-09-26	2024-08-16	2024-08-14	2024-08-29	2024-11-07		2024-09-03	2024-10-02	2024-10-14	2024-10-28	2024-10-18	2024-11-13	2024-09-12		DNA discharged	2024-10-16	2024-11-06	2024-08-07	2024-09-29	2024-10-09	25/09/2024 then discharged	2024-10-04	2024-11-18	2024-11-12	2024-10-25
Session total	2	3	5	3	2	5	2	1	3	3	3	3	4	3	5	2	2	3	1	2	3	3	2	2	3	2	1	1	3	2	3	6	4	3	4	3	3	3	#REF!
Mode used	T/C	T/C	A/A	T/C	A/A	A/A	A/A	F2F	T/C	A/A	AA	T/C	F2F	T/C	F2F	T/C	AA	T/C	T/C	T/C	T/C	T/C	T/C	A/A	T/C	A/A	A/A	F2F and TC	T/C	T/C	T/C	T/C	AA	AA	T/C	T/C	T/C	T/C
DNA	0	0	0	1	0	0	1	0	0	1	0	1	0	0	1	0	0	0	0	0	1	1	0	0	0	1	0	1		0	0	1	2	2	2	2	3	0	#REF!
Completed?	Y	Y	Y	Y	Y	Y	N	N	Y	Y	Y	Y	Y	Y	Y	Y	Y	Y	Y	Y	Y	Y	Y	Y	Y	N	Y	N	Y	Y	Y	Y	Y	N	Y	Y	Y	Y
Confirmed Dx'	ASD, ADHD	ASC and awaiting ADHD diagnosis	ASD, fibromyalgia	ASC, fibromyalgia, mixed anxiety and depression, anorexia, PTSD	ASC, LD	Previous diagnostic labels and suggestions of BPD / BAPD / Aspergers / c-PTSD / OCD. awaiting ASC and ADHD	ASC, awaiting ADHD	EUPD, Asperger's Syndrome / ASC, LD	ASC	ASC	ASC, OCD		ASC, EUPD, CF	Aspergers, ADHD	ASC, CPTSD	ASD, Aspergers, EUPD	ASC, EUPD	ADHD	EUPD. Was referred for ADHD and ASD (closed). Did not agree with EUPD Dx.	OCD, awaiting ASD and ADHD	awaiting ASC and ADHD	awaiting ASC and ADHD	ADHD		BPD, awaiting ASC and ADHD		awaiting ASC and ADHD	awaiting ASC		awaiting ADHD		EUPD	EUPD	ADHD	ADHD, BPD, ED, depression, anxiety	ADHD, been referred for aspergers closed twice.	EUPD
Reported difficulties	difficulties maintaining relationships and jobs, 'inntate trauma responses complicated by ADHD'. Anxiety, hypervigilance. Getting out and social engagement difficulties. CBT 'does not work for my brain'. Guilt, shame, rumination.	anger and aggression outbursts, difficulty decision-making, suicidal ideation and attempts, attends ASC group regularly, hears voices	flashbacks, intrusive thoughts and nightmares (PTSD), easily dysregulated, suic idea	struggles to speak to and sometimes be around people; overwhelm, emotional dysregulation, low self-esteem, intrusive thoughts, suic idea, binge eat, pick skin, pull hair	quiet during group, talkative in 1:1, low mood, anxious, scared	struggles making friends, identifying / understanding her emotion, suici idea, self-harm, difficulties, hyperaware, dysphoria,	anxiety, depression, CPTSD, trauma flashbacks, can become non-verbal in stressful situations, struggle with relationships and understanding self, isolation, rejection sensitivity, self-harm, headbanging, self-criticism, poor sleep; suic idea	cyclic mood, hears male voice to self-harm, panic attacks in overstimulating environments (noise and people), suic idea,	impulsive suicidal idea/self-harm thoughts, hears male voice to end life, hallucinations, struggle expressing self, feels no emotion, extreme high and lows, poor sleep patterns	hears male voice, visual hallucinations, PTSD	nightmares, masking, overwhelm, difficulty understanding emotions,	feels "don't belong here", prev self-harm	emotional dysregulation, hears voice, visual hallucinations, suic idea, prev self-harm, shame, guilt, anxiety, cyclical mood	social difficulties, anxiety, poor self-esteem, guilt, impulsivity	hypervigilance, suicidal idea, anxiety, poor sleep and eating, anger, noise sensitivity, rumination, intrusive thoughts, panic attacks	PTSD, anxiety, flashbacks, insomnia, suicidal idea, impulsivity	DSH of headbanging during 'autistic meltdowns', suicidal idea after relationship breakdowns, stress, physical affects, anxiety, withdrawal, nighmares	menstrual cyclic emotions, anger, depression, anxiety, emotional dysregulation, self-criticism, racing thoughts, hypervigilance, impulsivity, hears voice commands, abandomnent, loss of friends	difficulties with relationships, setting boundaries, people pleasing, overwhelm, paranoia, olfactory hallucinations, panic attacks, self-harm and suic idea	suic idea, panic attacks, compulsions/OCD hyperfixations and anxiety, social difficulties, eating disorders, self-criticism, wanting to 'take a break'	self-harm, suic idea, rumination, triggered by things seen (eg on tv), impulsivity, setting boundaries, people pleasing, self-critical, paranoia, expressing emotions.	grief, period heavily impacts mood and suic idea, PND, overwhelm, difficulties understanding others, taking things literally, people pleasing.	self-criticism, feeling abandoned and rejected, different all life, various unanswered calls/emails, anger outbursts	struggles with communicating, social situations, emotional dysregulation, hearing voices, visual hallucinations, affects sleep	extreme emotions, impulsive suic attempts, guilt, anger,	Struggles to identify and understand emotions; intense emotional/anger outbursts; rapid change in mood; poor sleep and eating patterns; suic idea; previous self-harm; particuarly related to relationship breakdowns	anxiety, paranoia, picks up on body language, struggles to let go of things, PTSD symptoms, low self worth, trauma flashbacks, hyperarousal, struggle managing daily stressors, isolation, internalising blame, thoughts of self-harm and suic idea	self-harm, suic idea, hears voice, PTSD	hears voices, sensory sensitivity, feeling an outsider throughout life and struggling to form relationships, suic idea, prev self-harm	suic idea, threats to others	anxiety, emotional dysregulation, shame, guilt, rumination, difficulties understanding emotions, impulsive suic idea, self-harm, headbanging	rumination, low self-esteem, masking, hears voice, guilt, emotional dysregulation, Suic idea, difficult body sensations, flashbacks	EDS, suic idea, rumination	social difficulties, isolation, ED, suic idea, catastrophising, anxiety, poor self-esteem, self-critical	dissociation, hears male voice derogatory or comforting female voice, visual hallucinations, DSH, overwhelm, paranoia	self-critical, anxiety, social difficulties, insomnia, overwhelm, DSH, racing thoughts	social difficulties, isolation, anxiety, PTSD flashbacks, poor sleep, dissociation, obsessive, suic idea, punching self in head, overwhelm
Resources Offered		support with T2D, letter to GP for support, anger man, Sean's Place, SMART goals, Crown Hub info,	I agreed i would get in touch with RASA to find out if she is on a therapy waiting list. Completed referral for her. We spoke about giving others the opportunity to be there for us instead of deciding on their behalf that we are a burden for them.	Sent: alternative to self-harming, catching negative thoughts, and self-compassion	coping strats on ESM group, MARAC completed, support/advice with court case and DV, Life Rooms, YPAS, TTL					provided [C10] with contact information to SF and if difficulties in joining the session. we discussed the window of tolerance and fight flight or freeze response. I offered to send some more detailed information about this to [C10], who agreed. Also information around challenging thinking styles and psychoeducation.	assessment - sent info on charity that helps people with autism secure employment, and a self-help guide on self-harm. SP - emailed resources on sleep hygiene, activating the vagus nerve and re-scripting imagery.	sent alternatives to self-harm and information about the vagus nerve and different ways to activate it.	sent email with alternatives to self-harm, vagus nerve information and some videos.	we talked about setting a daily routine, distraction techniques, anger management, anger purpose and the vagus nerve.	Link to Autism Spectrum Collective website, resource on sleep hygiene and vagus nerve, alternatives to self-harm, trauma psychoeducation				Suggested making referral with GP for ED. Emailed coping skills and psychoed workbooks. MeRIT and Crown St Hub assessments.	Emailed wheel of emotions, self-compassion, coping and grounding strategies. Emailed procrastination, ADHD and thought processing handout, psychoeducation workbook	sent details for Liverpool Bereavement Service and Citizens Advice Bureau. resources re. thought processing and self-compassion. Info on boundaries, coping and grounding strategies to help manage rumination. SMART goals guide for overwhelm	Info on self-compassion, boundaries, relationship between menstrual cycles and mental health, and self-care inventory. self-help tool for menstrual cycles, info for Liverpool Bereavement Service, Carer’s Allowance and Citizens Advice Bureau for support with applications	coping/groudning strats, SMART goals, fidget items, free hobbies, suggested to ask GP for ASC referral, sleep hygiene tips, support with ASC referral if needed, anger man, boundaries, info ADHD and procrastionatin	We agreed that I would check about the ASC diagnosis pathway. [C24] emailed to request a support letter for university as she is feeling overwhelmed to complete her assignments. I sent a letter to her and also attached handouts to manage energy levels.	Sent resources about worrying and anger				[C29] asked if a copy of the psychoeducation workbook could be sent to her which I agreed to. Assessment - I will also contact her student support services to highlight the extent of her difficulties recently and advocate on her behalf.		sent email with link of a box with a key (as she wasn"t sure what I meant about this). Plus alternatives to self-harm.	helped with ASC referral - help filling in form and clinician making referral. Sent email with information about the vagus nerve and some videos. Discussed and sent info on grounding, self-compassion, TIPP, positive affirmations, vagus nerve	Go through ASC form with her, make referral	Go through ASC form together in SP S3, make referral. Emailed resources on TIPP and vagus nerve	S4 - We also talked about different things she can do in the meantime to help her in the process of finding herself, such as organising her routine, finding hobbies, embrace the present moment, gratitude journal, journaling thoughts and feeling to clarify the mind, etc.	discussed vagus nerve and alternatives to SH. Sent by email and post. S2 - emailed and posted hope box PDF. S3 - Together we talked about different solutions/actions such as sleep hygiene, journaling, the worry tree, the worry time and the SMART technique.	S1 - I did psychoeducation around the threat responses and dissociation. [C37] stated "that is what happens to me", she mentioned this information helped her to make sense to her difficulties. We also spoke about trauma and it effects on the brain. Sent email with videos about trauma and the brain, and dissociation. S2 - some psychoeducation around hyperarousal and hypoarousal. S3 - An email has …
Requests / requirements	Flexibility in case of new job, preference for female clinician.	F2F appts to be out of school hours as he struggles with socials	would like support for trauma with a therapist with understanding of how this interacts with her neurodivergence. Has previously been recommended DBT and has heard of EMDR and is keen to explore this further should this be an option. Prefer female, early afternoon appts	[C4] said that she could attend F2F sessions. However, she may have difficulties to express herself at times and cannot pick up calls if she is not expecting them. We agreed that clinicians would first contact her by email so she can prepare herself for calls or have them scheduled in advance so she can avoid feeling paralysed.	Prerence for afternoon sessions	Preference for F2F. Name preference (not legally changed yet).	Preference for someone with experience in neurodiversity. [C7] requested that we take things slow due to information processing.	[C8] has informed she will bring a reborn doll to the sessions, as it helps her with the anxiety. Preference for F2F	Asked for resources to be sent via email but SP to be sent via post too.	For friend to join SP sessions. asked if I could explain a little about the safety plan. Expressed goal for better understanding of why brain functions the way it does.	Prefer face-to-face appointments, or if this is not possible telephone (not Attend Anywhere). She would also prefer a female clinician. Requested that clinicians text or email her prior to contacting her as she does not answer calls from withheld numbers.	S1- stated would like F2F appointments, however we agreed to have this first session via T/C and see how she felt.	mum accompanied (waited outside). For future appointments within service, [C13] has requested to contact her mum by telephone or email.		F2F, struggles with telephone	Help with filling forms	Requested female clinician (not provided)	Would prefer mornings for sessions because [C18's child] would be going with her and she could do this after the school run. She would also prefer to work with a female clinician as she would feel more comfortable in discussing certain topics.	Preferred TC for long term therapy	Preference for female clinician. Wanted next clinician to know he had been sexually abused so they wouldn"t be triggered if he mentioned this.	Discussed to request T/C or A/A to avoid pressure of getting somewhere in time if not feeling well. Stated may need to reschedule appointments around daughter"s school/sickness. Stated period can have impact on her would prefer a female clinician.			May want partner to attend some SP sessions. Prefer TC appointments in afternoon. Asked that her clinician doesn't speak too loud as is sensitive to noises, be sent reminders for sessions, and have patience with her as she can take some time to interact in conversations (may ask to repeat question, may stay in silence while searching for an answer, may be mostly quiet but engaged).	preference for TC in morning		Call from [C27]'s mum to opt-in, consent obtained from [C27] who was in the background to discuss with mum. [C27] has anxiety with phone calls and feels unable to make them herself but can manage to receive them, she therefore wanted Face-to-face initially but once I had explained this would incur a delay to due to room shortages, she agreed to a telephone assessment.	assessment - made referral for ASC as requested. preference for F2F - find telephone and online appointments triggering.	preference for F2F sessions		Assessment - prefer sessions via phone or online and she struggles to make eye contact in person and finds she can stutter which can increase anxiety.	Would like female from a similar background to do her sessions. Would prefer F2F on a Thursday. S1 -stated a letter from our team explaining her difficulties and requesting support by her work could help her. S2- she would like a summary letter of her difficulties and the plan within our team, as a proof of the referral, the work and the future plan to work on her mental health.	SP - [C33] has requested a referral for a ASC assessment by our team. Email sent with techniques discussed.	assessment - [C34] said he was unsure about the group due to anxiety which we normalised and he said he would like to try this. We discussed that he can change his mind and be offered individual sessions if he would prefer if he lets us know. gave consent for information to be shared with his mother	Emailed after S3 - I forgot about the appointment however i thought someone would phone me when i wasn’t on the video call. I also was wondering how after these sessions what happens because last weeks session proved to be quite a lot for me and i’m just worried that this last session is all i get from your service and i don’t think it’s helped just having three sessions.		assessment - requested F2F	F2F
Possible adaptations?	Offered TC instead of F2F if low in mood.		[C3] spoke about her ASC diagnosis and how she tries to always stay positive and masking. We discussed the importance of letting ourselves feel sad at times to process our struggles as it can be exhausting to always be positive. S3 - feeling very down and exhausted from masking and trying to be positive. I reassured her and offered extra session to go through those specific things to support her …	During the session, [C4] appeared emotional and still had difficulties with expressing herself at times. she identified her main goal as to "be able to do normal things like everyone else". We discussed Crown Hub support and we agreed that we would complete a referral so we extended the session an extra 20 minutes for this purpose. In line with [C4]'s concerns about her current social worker who …		I suggested to reschedule the session and she agreed as she didn"t think she would be very engaged throughout if we went ahead. I reminded her that she can contact us before the session to reschedule.	Advised in initial assessment can invite partner/PA to join sessions to support engagement. SP S1 - after explaining content of safety plan, [C7] felt overwhelmed and questioned if felt ready to engage; felt uncomfortable exposing herself/talking about history with someone she just met. I gently assured [C7] that we wouldn"t need to delve into past history and safety plan was a document to captur…	[C8] apologised about becoming upset during the session, we offered reassurance around this [C8] declined safety planning, due to not feeling up to it. Additional sessions, same clin as coping skills intervention, booked f2f, sensory adaptions to room, allowing grounding objects (doll), direct questions (no abstract / complex examples)	[C8] asked me if I thought how she was feeling was "normal", validation and reassurance given and was accepted well.	S1 - after around 20 minutes on the session, [C10] turned on her camera and reassurance was offered. [C10] said she understood the reason for completing a safety plan and was happy to do so. I made [C10] aware that if she wishes [C10's friend] to be part of her next sessions this would be acceptable. S2 and S3 - [C10] had her microphone on throughout, however did not have her camera on	Contacting by email as not reaching TC. Offered F2F or TC. S1- attended AA with microphone on and camera off. [C11] mentioned by email she would like to keep her camera off as she does not feel comfortable. Client discussed ASC masking. S2 - talked about different strategies she can use such as sleep hygiene, activating the vagus nerve and re-scripting imagery. Sent SP by post.	Contact with mum r.e. SP	TC to [C13]'s mum as I could not reach [C13] last week after two attempts. [C13's mother] has mentioned [C13] does not pick up her phone if she does not know the number. S1- She explained she was not sociable and always felt different, and stated secondary school was horrible for her. We talked her about her ASD diagnosis, which might explained this feeling. Sent SP by post too.	Sent SP by email and post	Additional sessions, environmental sensory adjustments, ASC psychoeducation				Discussed support to complete household chores. Provided supporting letter for uni extensions.	Ax - Several attempts made to contact via email and phone to request completes outcome measures. S1 - Discussed potential referral to ED service. Three separate calls to finish session. Offered to do outcome measures together during session. S2 - Spoke about ADHD and procrastination - compassionate approach not based on self-blame and self-criticism due to feeling "lazy". Spoke about confirmation…	discussed possibility of partner attending F&F group. Discussed break after session before resuming work.	Discussed boundaries and effective communication. Provided link to request Carer’s Allowance from the Gov.co.uk site, and details for Citizens Advice Bureau for support with any applications. Emailed requesting call back as had troubles self-referring with Liverpool Bereavement Service - clinician spoke to her and called service to enquire.	given additional opportunities to attend sessions from opt-in to calling back to not miss appt, suggested to contact GP for ASC referral	She did not turn her camera on and couldn't hear me - I phoned her during AA and kept my camera on.		Group ECS intervention was suggested to him but he declined shared he would not function well in a group.					S2-We talked about trying the alternatives to SH a few times before deciding which ones could help, as our brain needs time to process changes. We also explored distraction techniques when feeling the urge, and talked about keeping her razors away to delay the impulse. Email sent with pic of box and key as she wasn't sure what I meant. Sent resources by post too. S3- We talked again about trauma …	S3 - [C32] mentioned she thinks she can have an undiagnosed autism. We agreed we were going to fill the ASC form together and I was going to send a referral to the ASC diagnose team. We talked about the importance of activating the vagus nerve to feel relax and content and to deal with difficult situation. We agreed she was going to think about an after work routine she can do to make sure her va…	offered AA and TC. S2 - helped filling in ASC referral form. Booked 2 more sessions to complete SP. S3 - We talked about organising a routine and writing it down, having a good night routine (sleep hygiene), distractions, being in the present moment, etc. I introduced the worry tree, the vagus nerve, the SMART goal and meditation around activities. S4 - requested change in planned intervention - …	[C34] is happy to try video consultation, however, we agreed to do F2F if needed. S1 - It was a bit difficult for [C34] to recognise the differences and the emotions/feelings linked to each mood. S2 - camera off, mic on. It was a bit hard for [C34] to think about alternatives and different points of view/thinking. While [C34] was talking about his difficulties, I linked a lot of them with autism.…	S3 - mic on cam off. S4 - mic on cam off. Recent DSH - I shared a "relapse graphic" to pinpoint the recovery journal and the relapse stage on the process of change. S5 DNA - I don’t want to count this as a missed appointment and step you down from the service, so could you please just answer the last questions of the safety plan by responding to this email?	Reopened referral after 2 DNA. Emailed and posted SP.	Checked before SP - happy to have SP over phone but therapy F2F. S1 - re-referred to Life rooms. S2 - planned to fill out ASC form together, but after 3 DNA this did not happen. Reopened referral. Emailed and posted SP.
Mode Requested		F2F		F2F		F2F		F2F			F2F, if not possible, TC.	F2F			F2F				TC		TC or AA			TC	TC		F2F		F2F		TC or AA	F2F		F2F			F2F	F2F	18
Support Requested	Scheduling flexibility	GP letter, scheduling flexibility	Service contact, scheduling flexibility	Aware may have difficulties expressing self, email before calling	Scheduling flexibility	Aware of name preference	Slow pace for info processing. Follow up - more support for emotional dysregulation following sessions	Bring doll to session		Friend to join, explanation of safety planning	Text or email before calling	Contact with mum r.e. SP	Contact mum for future appts, avoids unknown calls			Help with ASC form		Scheduling flexibility, aware of menstrual cycle impact, GP support	Support letter for uni extensions	Clinician aware of past trauma	Aware of menstrual cycle impact, scheduling flexibility			Scheduling flexibility. Partner to join. Reminders for sessions; aware that may ask to repeat questions; clinician to not speak too loud, is patient, allows time to respond. University support letter. Autism referral support.	Scheduling flexibility		Mum support with contact, anxiety with calls	Referral for ASC (assessment)	University support letter (assessment)		Visual aids, aware of eye contact difficulty and stutter (increase anxiety)	Scheduling flexibility, letter for work support, ASC referral support	Referral for ASC	Info share with mum, agreed to ASC referral support	Contact flexibility, support continuity, clarity on next steps	Support letter for university		Support for phonecall anxiety, ASC referral
Clinician Preference	Female		Female, understands neurodivergence and interaction with trauma				Experience in neurodiversity				Female						Female	Female, more comfortable discussing certain topics		Female, aware of trauma	Female, menstrual cycle impact			Patient, doesn't speak loudly								Female from similar backgound							#REF!
Session Adjustments			Spoke for 30 mins, scheduled 2 additional sessions	Additional session for service referral (Crown Hub). Rescheduled once		Rescheduled S2 (engagement). S3 - took 5 min break. S4 - forgot about session, 15 mins late. Felt drained, ended session early; scheduled another		Additional sessions, sensory adaptions to room, allowing grounding objects (doll)		Turned on camera after 20 mins. S2 and S3 - camera of.	Camera off, uncomfortable		Additional session		Additional sessions, environmental sensory adjustments				Additional session for MARAC	Three separate calls	Rescheduled once	Rescheduled once	Additional session opportunities from opt-in to calling back to not miss appt	Camera off								Additional session to do ASC form	Additional session to do ASC form	Camera off, additional session for ASC form	Camera off, complete SP over email due to DNAs		Checked prior - happy with TC for SP only	Session to do ASC form and referral
Clinician-offered ASC / Support	Offered TC instead of F2F if low in mood. Noted observation of guilt, shame and unfulfilment, possibly linked to ASC.	Exploration of ASC	Offered additional sessions to support ASC difficulties like masking following distressing social incident. Discussed need to to process feelings to prevent overwhelm (e.g. worry time). Sent over some sections of SP for client to think about during the week to ease discussion.	Agreed that clinicians would not make unexpected calls		Suggested to reschedule session due to engagement difficulty. Ended S4 early and scheduled another.	S2 - CP called after call termination and assured client would not be discharged for being unable to engage in SP. SP follow up with AP - suggested to discuss with next practitioner how they can adjust sessions given ASC needs.	Direct questions (no abstract/complex examples)		Informed that friend can join.			Discussed diagnosis, which might explain this feeling.		ASC education. Rreflected on how our environment can affect our nervous system and can increase anxiety/panic attacks. We talked about useful strategies such as noise-cancelling earplugs. We also talked about the importance of routine for our brain, specially in people with autism. . I suggested [C15] to try the alternatives he picked at least 5-10 times, to give time the brain to get familiar wi…			S2 - explored ADHD diagnosis and if client had also had ASC assessment, explored ASC traits and benefit of getting ASC assessment; offered support with this if needed. S1 - explored menstrual cycle impact and GP support.	Discussed support for household chores.	Compassionate approach to reduce self-blame and criticism, suggested thought diary for catastrophising	Suggested to take break after session before work	Supported with service referral	Suggested to contact GP for ASC referral	TC during AA for hearing. Explored diagnosis query and agreed to check ASC pathway. After SP, sent support letter for uni extensions. Discussed barriers in S2 for future interventions.	Explored ASC referral; discussed managing sensory overload.						Sent visual for hope box understanding. Suggested partner support for answering questions.	Agreed to fill ASC form together and send referral. Guided clear step-by-step plan to navigate upcoming stressful day (work/crisis). Offered to contact Crisis Team on client's behalf.	Fill ASC form together.	Suggested to try group and can change mind. Noticed disfluency in speech and slower processing speed (suspected ASC), explored observations with client; discussed pros of ASC assessment. Suggested to fill ASC form and make referral.	Completed SP over email following DNA to avoid discharge. Suggested thought journalling. Provided info on group ECS and how to request 1:1.	Reopened referral after 2 DNA. Sent visual of hope box.	Planned to fill out ASC form together, but after 3 DNA this did not happen. Reopened referral.	S1 - offered 30 min call due to anxiety of long phone call. Asked about client's cats to reduce anxiety. Agreed to do ASC form and referral.
Client ASC Difficulties/Concerns	Stated found group ECS uncomfortable, struggled with long sessions, maintaining focus. Expressed 'doesn't know how to be part of the world sometimes'. Diagnosis of ADHD and ASD and reflected on the impact this has upon him in terms of managing his mental health. Shared that he feels he still has lots of "innate trauma responses" he feels are cmplicated by his ADHD diagnosis and particularly refle…		Spoke about diagnosis and masking. Planned to explain to partners about different perception due to ASC. S3 - distressed, expressed aversion to cancelling session 2nd time. Expressed need for clear communication	Difficulty expressing self		S1 - Difficulty engaging, S3 - discussed sensory tools. S4 - felt drained by end of session.	S1 - Overwhelmed after content of safety plan explained, questioned if ready to engage. Felt uncomfortable exposing self and history to someone just met. Requested slow pace for info processing. S2 - entered in heightened state and expressed not wanting to continue SP, triggered thoughts and DSH. Sick of repeating self to HCP, feels like 'guinea pig' for assistants/trainees who don"t know enough …	Apologised for becoming emotional. Declined SP for not feeling up to it.	Asked if how felt is normal	"Support around tolerating people better". "Give me a better understanding of my brain functions the way it does".	Discussed masking.		Discussed social difficulties and feeling different		We talked about autism and some difficulties such as hypersensitivity. Struggles with crowded places, brightness and noises. [C15] was reflective and linked hypersensitivity/environment stimulus with anxiety/panic attacks. Said he feels the alternatives won"t have the same effect as they won"t be as painful/effective as self-harm.	S1 - Said he thinks his autism has played a part in him feeling overwhelmed and self harming as he said he did this as a way to process his emotions. S2 - Noted his self awareness and intellect can make it seem he is doing better than he actually is. He noted previous interactions with services where it has been noted he was doing well / looked well kept however he felt extremely low mentally at …	Discussed assistance dog, academic and pastoral uni support for ASC	S2 - stated had not had ASC assessment as went through Right to Choose pathway since NHS referral would have taken years. Expressed may be helpful in understanding self, could identify some traits in self. S3 - stated had completed ASC forms for referral and plans to pursue assessment .						S1 - stated would like to receive diagnosis of ASC to have better understanding of difficulties, friends with ASC told her she displays common traits	Chose to end session early as nothing else wanted to speak about. Stated felt drained and initially planned to reschedule session (#3).	Declined group ECS due to not functioning well in group		Stated find TC and AA triggering		Stated autistic once in hospital, no further mention	Struggles with eye contact in person and can stutter, increases anxiety.	Shared belief of having undiagnosed ASC. Discussed triggers and lack of support at work. When clinician offered contacting Crisis Team on client's behalf, declined and stated not helpful in the past. When asked to plan next steps for the day to ensure safety, became overwhelmed and difficult to think. When I explored planning the next steps for the day, to ensure her safety Leilah became overwhel…	S1 - stated feels might have autism as has some traits, explained was referred in the past by SF but struggled completing first questionnaire as didn't feel read; requested a referral for ASC assessment by our team. Struggles to recognise her emotions and express them.	Stated uncertain about group ECS due to anxiety. Difficulty with recognising changing moods/'what do I know about me'	After S3 - Expressed by email not feeling helped by SP service/only 3 sessions, questioned what's next, overwhelmed following third session. Asked about 1:1 ECS rather than group.			S1 - stated not good with technology/phones and feeling really anxious about call; asked how long it would take, anxious around being 1 hour over phone. Agreed to 30 min session, however, felt more comfortable throughout. At end of session, stated thinks on ASC spectrum, was mentioned in assessment and sees traits. Stated struggles with online referral with Psychiatry UK.
